# Supplementary material
Source: Springer Nature journal article supplement (https://www.springermedizin.de/resource/supplementary/12958_2009_556_MOESM4_ESM.pdf/9568300)

(i)

Expression of IL-4 mRNA

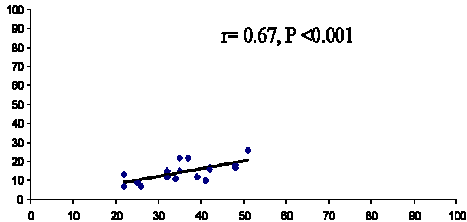

Expression of GATA3 mRNA

(ii)

Expression of IL-4 mRNA

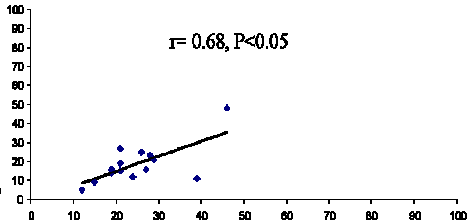

Expression of GATA3 mRNA

Supplement: MOESM4 [file 9568300]
